# Supplementary material for: 3D domain swapping in the TIM barrel of the α subunit of Streptococcus pneumoniae tryptophan synthase
Source: PubMed Central journal article supplement (PMC7008512; doi:10.1107/s2059798320000212), 2020-01-31
Supplement: d-76-00166-sup1.pdf [file d-76-00166-sup1.pdf]

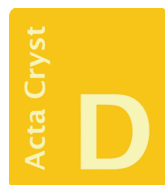

STRUCTURAL  
BIOLOGY

**Volume 76 (2020)**

**Supporting information for article:**

**3D domain swapping in the TIM barrel of the  $\alpha$  subunit of  
*Streptococcus pneumoniae* tryptophan synthase**

**Karolina Michalska, Marcin Kowiel, Lance Bigelow, Michael Endres, Miroslaw  
Gilski, Mariusz Jaskolski and Andrzej Joachimiak**

**Table S1** RMSD (Å) for pairwise C $\alpha$  superpositions of the dimers (with the numbers of superposed atoms in parentheses). The superpositions were calculated using the *align* procedure of PYMOL.

| Dimer | CD         | EF         | GH         | IJ         |
|-------|------------|------------|------------|------------|
| AB    | 0.43 (444) | 0.83 (431) | 0.80 (461) | 1.55 (485) |
| CD    |            | 0.74 (437) | 0.62 (487) | 1.52 (482) |
| EF    |            |            | 0.56 (411) | 1.09 (463) |
| GH    |            |            |            | 1.61 (462) |

**Table S2** Ramachandran  $\phi/\psi$  angles ( $^{\circ}$ ) of the hinge region Ile55-G64 of the A-J subunits of the 3D domain-swapped dimers.

| $\phi/\psi$ | I55      | P56     | F57     | S58      | D59     | P60    | V61     | A62     | D63     | G64     |
|-------------|----------|---------|---------|----------|---------|--------|---------|---------|---------|---------|
| A           | -104/127 | -68/146 | -92/122 | -113/137 | -78/152 | -91/0  | -63/124 | -134/27 | -84/-17 | 99/166  |
| B           | -103/127 | -68/145 | -90/123 | -106/133 | -72/136 | -94/-1 | -71/125 | -133/26 | -82/-17 | 98/166  |
| C           | -104/127 | -69/147 | -90/124 | -110/138 | -75/151 | -92/0  | -66/125 | -134/27 | -84/-17 | 99/167  |
| D           | -103/127 | -68/146 | -91/122 | -107/131 | -72/136 | -93/-1 | -71/126 | -132/26 | -81/-20 | 99/163  |
| E           | -102/128 | -68/145 | -92/123 | -107/132 | -75/138 | -91/-1 | -69/126 | -133/27 | -85/-15 | 97/167  |
| F           | -103/128 | -69/145 | -92/123 | -108/134 | -70/137 | -90/0  | -65/126 | -133/26 | -85/-15 | 99/170  |
| G           | -103/127 | -68/146 | -91/120 | -108/132 | -79/146 | -92/-1 | -68/125 | -138/31 | -83/-16 | 100/166 |
| H           | -104/127 | -69/146 | -91/122 | -111/135 | -77/151 | -92/1  | -65/125 | -132/26 | -82/-18 | 99/166  |
| I           | -102/127 | -66/143 | -96/123 | -107/130 | -72/138 | -95/-1 | -67/124 | -133/27 | -85/-15 | 99/170  |
| J           | -103/127 | -66/143 | -96/122 | -108/130 | -79/147 | -91/-3 | -69/126 | -132/25 | -85/-16 | 97/167  |

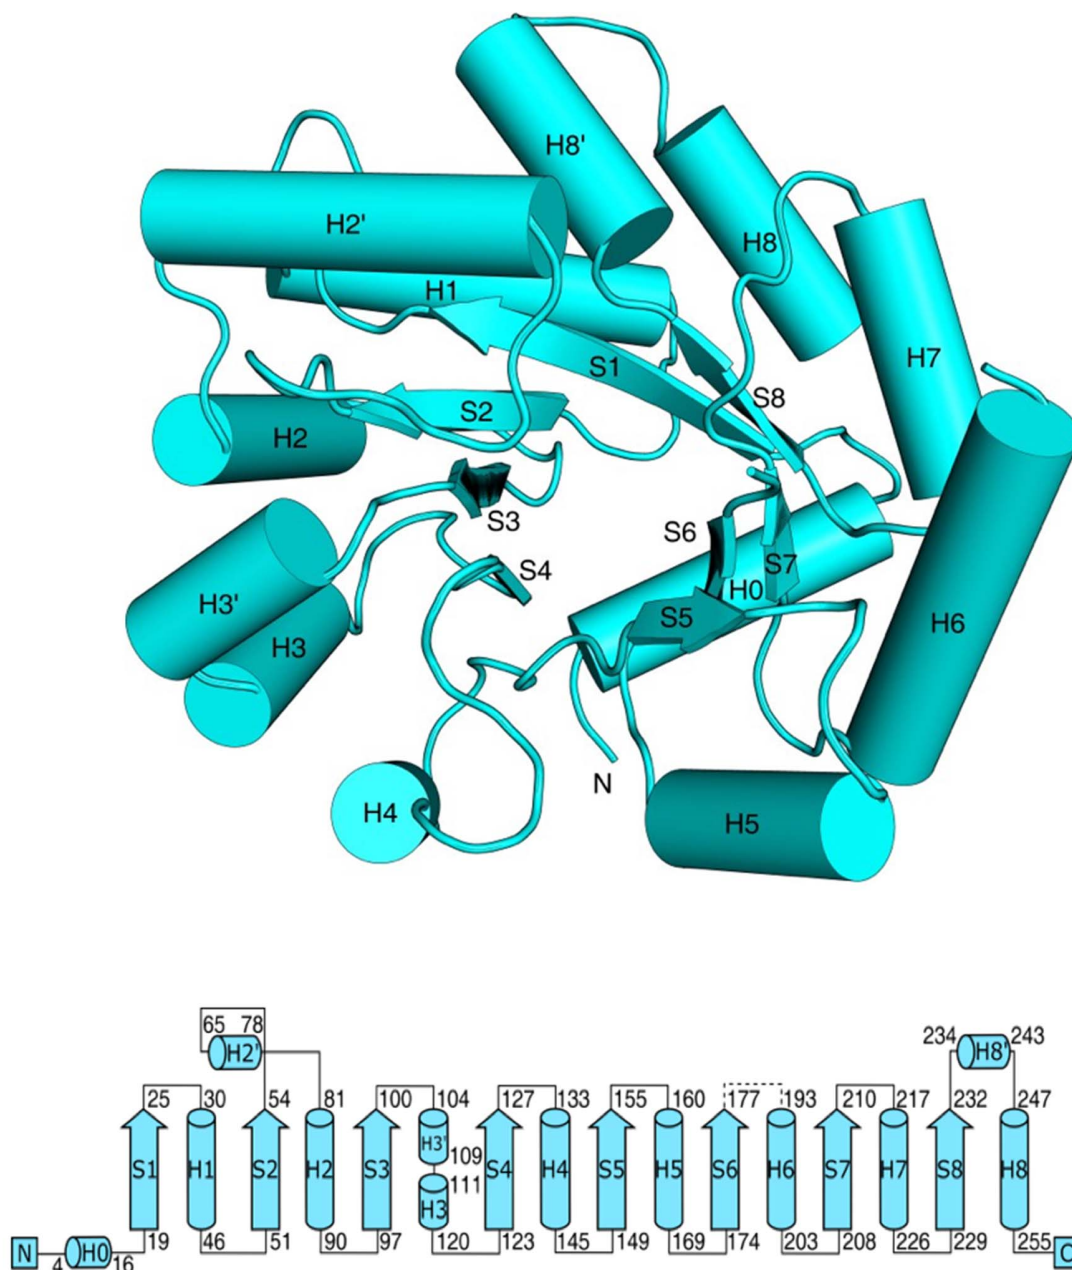

**Figure S1** A view of the subunit  $\alpha$  TIM barrel from the *Sp*TrpAB PDB structure (PDB id: 5KIN) (chain A) down the barrel axis (top) and the topology of the secondary structure elements (bottom). Helices are marked as cylinders and labeled H0-H8,  $\beta$ -strands are marked as arrows and labeled S1-S8. Residue ranges for the  $\alpha$ -helices and  $\beta$ -strands are marked next to the cylinders and arrows. The disordered part of the structure is marked with dash line.

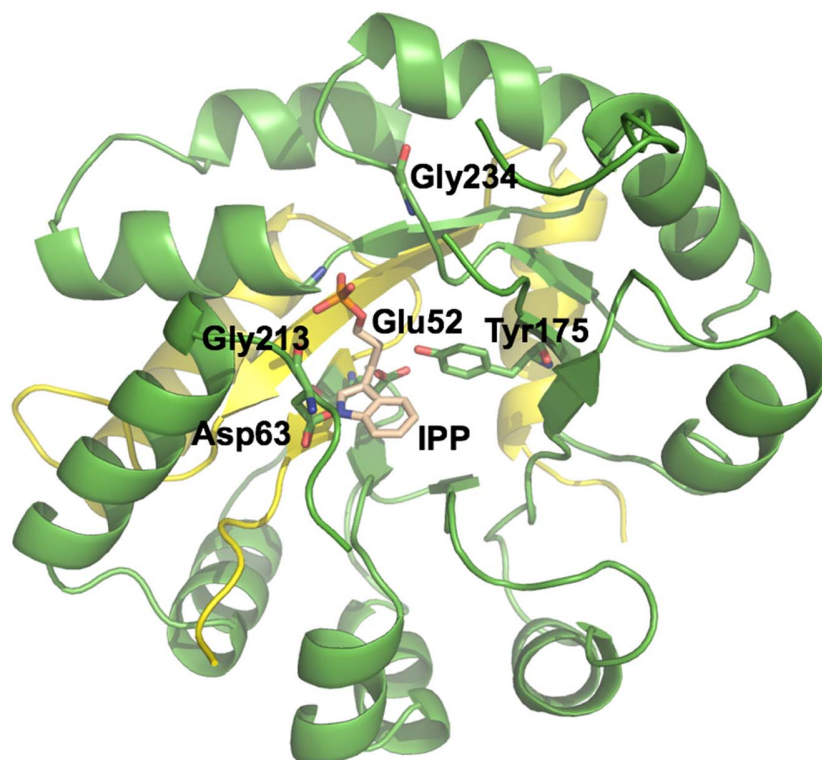

**Figure S2** TrpA active site with key catalytic residues. The architecture of the catalytic apparatus in  $\alpha_2$  is regenerated from the two protein chains, C (residues 1-59, yellow) and D (residues 60-258, green). Indol-3-propanol phosphate (teal) from the *Sf*TrpAB structure (PDB id: 1QOP) (Juarez-Vazquez *et al.*) marks the position of the IGP substrate.

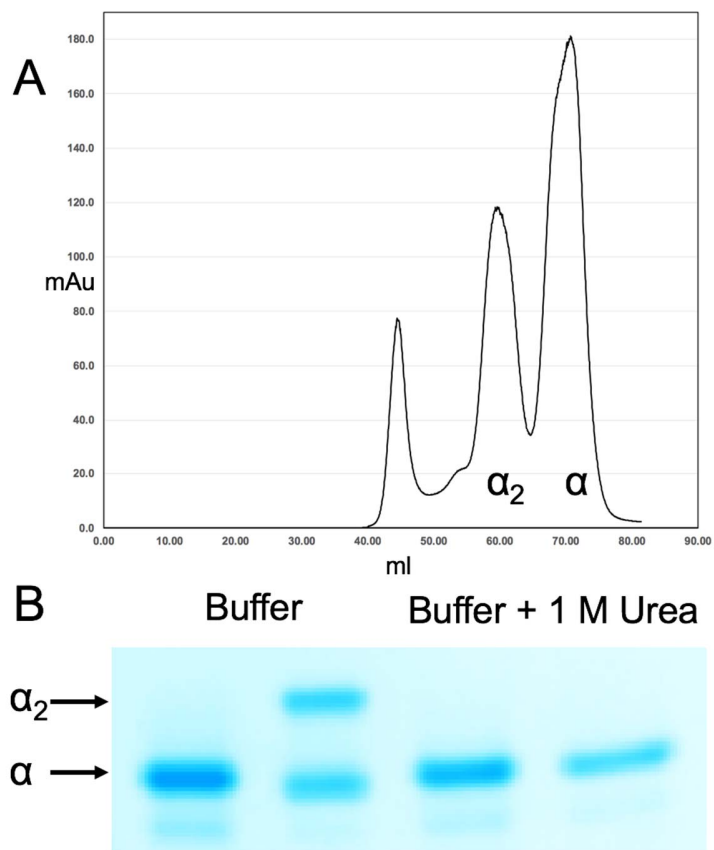

**Figure S3** Separation of *SpTrpA* on SEC and native PAGE. (A) SEC on Superdex 200 HiLoad 26/60 column in 250 mM NaCl, 20 mM HEPES pH 8.0, 2 mM DTT as described in Materials and methods. (B) Native PAGE electrophoretogram showing separation of *SpTrpA* monomer ( $\alpha$ ) and *SpTrpA* dimer ( $\alpha_2$ ). The dimer fraction after purification always showed some monomer present. After treatment with 1 M urea all dimers are converted to monomers. The buffer was 50 mM NaCl, 20 mM HEPES pH 8.0 and 2 mM DTT.

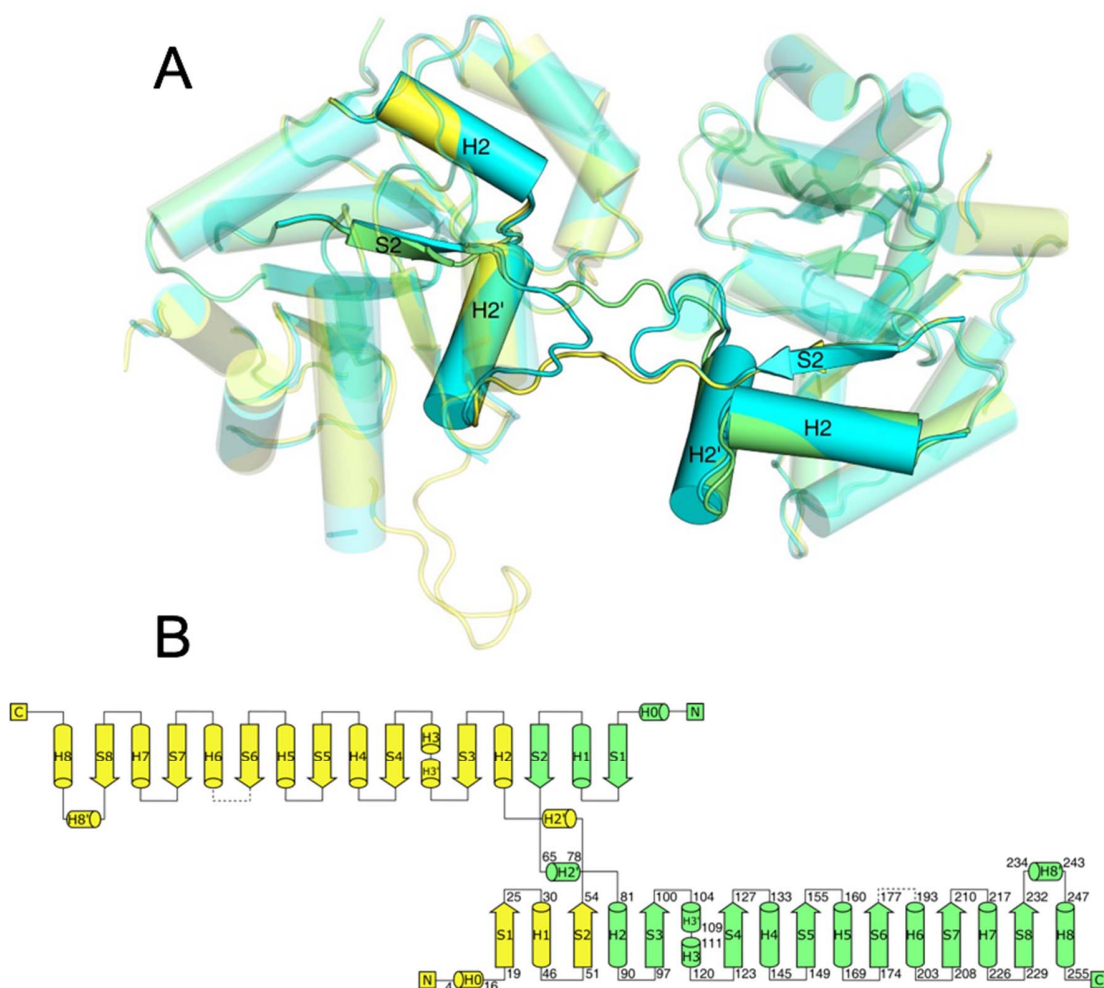

**Figure S4** Illustration of the hinge region of the *SpTrpA* 3D domain-swapped dimer CD (yellow-green), superposed on two copies of chain A from the *SpTrpAB* structure (PDB id: 5KIN) (cyan). The  $\beta$ -strand S2 and helices H2' and H2 are labeled. In the *SpTrpAB* structure, the linker (corresponding to the closed conformation) after emerging from strand  $\beta$ S2, first turns away from helix H2, then turns down, to finally turn again and enter helix H2'. In the open conformation, the linker continues directly from  $\beta$ S2 to helix H2', avoiding any crossing with its replica in the dimer. (A) A cartoon model; (B) a topology diagram.

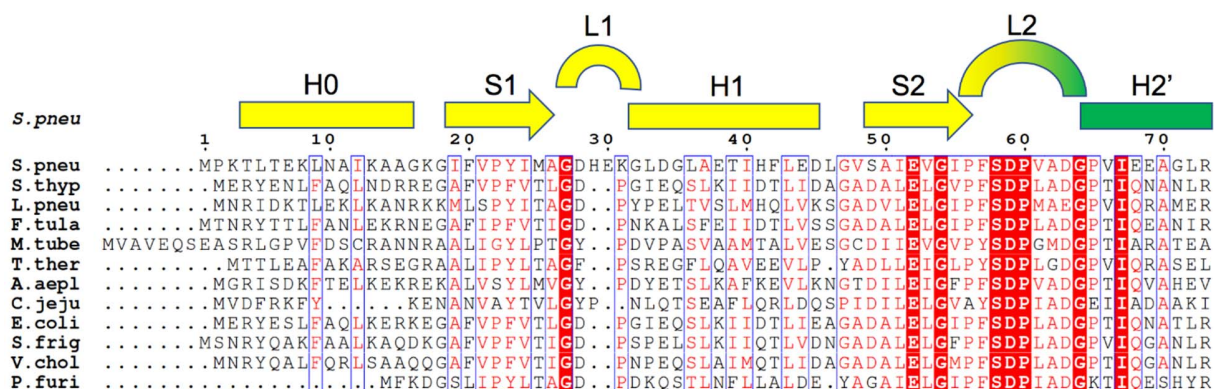

**Figure S5** Structure-based sequence alignment of the N-terminal region of TrpA proteins with known crystal structures. The PDB deposits used in the alignments are as follow: 5KIN\_C (*S.pneu*), 5CGQ\_A (*S.thyp*), 50CW\_W (*M.tube*), 1WQ5\_B (*E.coli*), 5KMY\_A (*L.pneu*), 3VND\_H (*S.frig*), 3THA\_B (*C.jeju*), 2EKC\_B (*A.aepl*), 3NAV\_B (*V.chol*), PE0K\_K (*P.furi*), 5KZM\_A (*F.tula*) and 1WXJ\_A (*T.ther*). The surface protrusion helix H2' is a topological novelty in TrpA that makes the S2-H2' L2 loop a hinge suitable for 3D domain swapping. In addition, the *Sp*TrpA has a small insertion (L1) between S1 and H1 that makes domain swapping much more likely. This insertion is present only in the TrpA sequences from *Streptococcus*, *Lactococcus* and *Floriccoccus* species. Yellow-highlighted secondary structure elements correspond to the N-terminal region that is swapped in the dimer, green corresponds to the C-terminal region. In the sequence alignment the red-highlighted amino acid residues are strictly conserved, red character amino acids are similar in a group and blue boxes indicate similarity across groups.

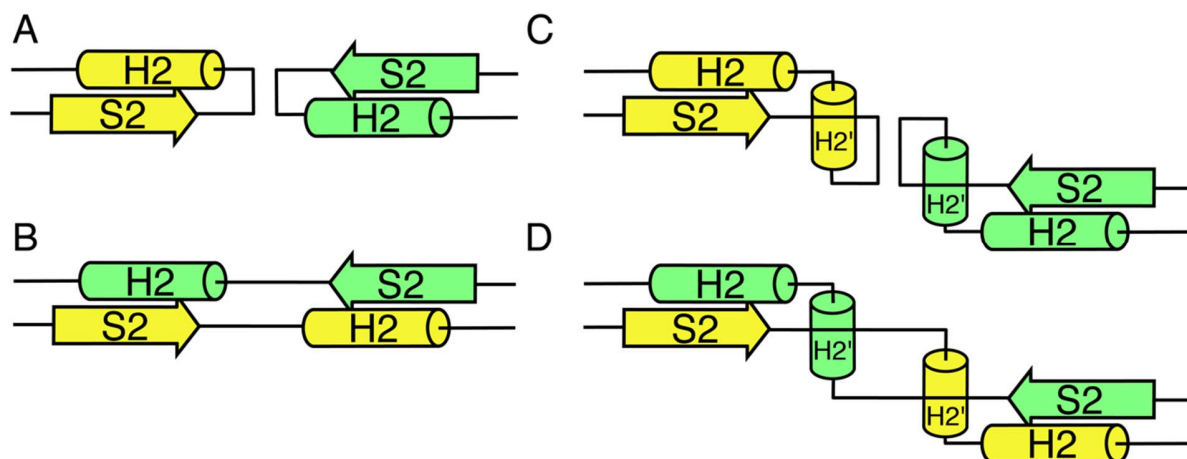

**Figure S6** Comparison of a simple 3D domain swapping event (A, B), where the hinge loop simply has to straighten up, with a more convoluted change (C, D), as in *SpTrpA*, that involves an intermediate helix (H2') element that helps to avoid direct linker intersection.
